# Supplementary material for: Dynamic chromosomal tuning of a novel GAU1 lncing driver at chr12p13.32 accelerates tumorigenesis
Source: PubMed Central journal article supplement — Nucleic Acids Res. 2018 May 8;46(12):6041–56. doi: 10.1093/nar/gky366 (PMC6158754; doi:10.1093/nar/gky366), 2018-05-08
Supplement: gky366_supplemental_files.pdf [file gky366_supplemental_files.pdf]

## Supplementary files

### **Dynamic chromosomal tuning of a novel *GAUI* lncing driver at chr12p13.32 accelerates tumorigenesis**

Peiwei Chai\*, Ruobing Jia\*, Renbing Jia\*, Hui Pan\*, Shaoyun Wang\*, Hongyan Ni,  
Huixue Wang, Chuandi Zhou, Yingyun Shi, Shengfang Ge, He Zhang#, Xianqun Fan#

Department of Ophthalmology, Ninth People's Hospital, Shanghai JiaoTong University  
School of Medicine, Shanghai, P.R. China

\*These authors are co-first authors of this report.

#These authors are co-corresponding authors of this report.

Requests for reprints:

Xianqun Fan, Ph.D, Ninth People's Hospital, Shanghai JiaoTong University School of  
Medicine, Shanghai, 200025, P.R. China, E-mail: fanxq@sjtu.edu.cn;

Present address: He Zhang, Ph.D, School of Life Science and Technology, Tongji  
University, Shanghai, 200092, P.R. China, E-mail: zhanghe@sjtu.edu.cn;

## **MATERIALS AND METHODS**

### **Tryptic digestion and peptide desalting for LC-MS/MS**

First, 5 mM TCEP was added to each cell sample, which was mixed and incubated for 10 min. After the samples cooled to RT, 10 mM IAA was added followed by incubation in the dark for 15 min. Trypsin was resuspended with resuspension buffer to a concentration of 0.5  $\mu\text{g}/\mu\text{L}$  and incubated at RT for 5 min. A 1- $\mu\text{L}$  volume of trypsin solution was then added to each sample, which was mixed well, centrifuged, and incubated with a Thermo mixer for 8 h. Then, the reaction was quenched with 1% TFA. C18 columns were equilibrated with 200  $\mu\text{L}$  of acetonitrile (ACN). The ACN was then washed out with 200  $\mu\text{L}$  of 0.1% FA 2 times, and the wash-out was discarded. The peptide solution was loaded into the tip of the C18 column and allowed to flow-through the column slowly; the flow-through was collected. The peptide loading step was repeated. Then, the column was washed with 200  $\mu\text{L}$  of 0.1% FA, and the wash-out was discarded. The peptides were eluted with 50  $\mu\text{L}$  of 70% ACN, and the eluate (B) was collected in a new tube. The desalting procedure was repeated (up to the 6th step) using the flow-through (A). The 2 eluates (B) were combined and vacuum dried. The peptides were resuspended with 10  $\mu\text{L}$  of 0.1% FA for LC-MS/MS analysis or stored as a peptide powder at  $-80^{\circ}\text{C}$ .

### **LC-MS/MS**

Half of each peptide sample was separated and analyzed with a Nano-HPLC coupled to a Q-Exactive mass spectrometer (Thermo Finnigan). Separation was performed

using a reversed-phase column (100  $\mu\text{m}$ , ID  $\times$  15 cm, Repronil-Pur 120 C18-AQ, 1.9  $\mu\text{m}$ , Dr. Math). The mobile phases were H<sub>2</sub>O with 0.1% FA and 2% ACN (phase A) and 80% ACN and 0.1% FA (phase B). Separation of the sample was executed with a 120-min gradient at a 300 nL/min flow rate. Gradient B was as follows: 8–35% for 92 min, 35–45% for 20 min, 45–100% for 2 min, 100% for 2 min, 100–2% for 2 min and 2% for 2 min. Data-dependent acquisition was performed in the profile and positive mode with the Orbitrap analyzer at a resolution of 70,000 (200 m/z) and m/z range of 350–1400 for MS1; for MS2, the resolution was set to 17,500 (200 m/z). The automatic gain control (AGC) target was set to 1.0e+06 for MS1 and 1.0e+05 for MS2. The top 10 most intense ions were fragmented by higher energy collisional dissociation (HCD) with a normalized collision energy (NCE) of 28% and isolation window of 2 m/z. The dynamic exclusion time window was 30 s.

### **MaxQuant database search**

Raw MS files were processed with MaxQuant (Version 1.5.6.0). The human protein sequence database (Uniprot\_HUMAN\_2016\_09) was downloaded from UNIPROT. This database and its reverse decoy were then compared by MaxQuant software. The quantification type was MS1; trypsin was set as the specific enzyme with up to 2 miss-cleavages; oxidation [M] and acetyl [protein N-term] were considered as variable modifications, whereas carbamidomethyl [C] was set as a fixed modification; and both peptide and protein FDR should be less than 0.01. Only unmodified unique peptides were used for quantification. iBAQ label-free quantification was also performed with

log fit checked.

## **Figure legend**

Supplemental information includes 13 figures and 4 tables.

## **Supplementary Tables**

**Supplementary Table 1** Primers, oligos, shRNA, siRNA and sgRNA used in the experiment.

**Supplementary Table 2** The clinical characteristics of retinoblastoma patient cohorts.

**Supplementary Table 3** The clinical characteristics of neuroblastoma patients.

**Supplementary Table 4** The list of lncRNA *GAUI* binding proteins.

## **Supplementary Figures**

**Supplementary Figure 1 A novel transcript found at chr12p13.32.** (A) RT-PCR was performed to measure *GAUI* expression in uveal melanoma, conjunctival melanoma and blastoma cell lines. (B) The 5' and 3' RACE results in Y79, WERI-Rb1 and SK-N-AS cells. (C) The full sequence of *GAUI*. (D) Schematic of the RACE result for

*GAUI*. The first exon is expanded by 57 bp at the 5' terminus and by 4 bp and a poly-A tail at the 3' terminus.

**Supplementary Figure 2 The epigenetic modifications in the *GAUI/GALNT8* cluster.** (A) Schematic of the ChIP site of *GAUI/GALNT8* cluster. (B-D) ChIP assay was performed to estimate histone methylation (H3K4me1, H3K4me3, H3K9me3, H3K36me3), acetylation (H3K9Ac, H3K27Ac) in *GAUI/GALNT8* cluster. Epigenetic screening of histone modification and chromatin organization was performed in *GALNT8* (B), *GAUI* (C) and distal region (D). All the experiments were performed in triplicate and are presented as mean  $\pm$  SEM. \* $p < 0.05$ , \*\* $p < 0.01$ .

**Supplementary Figure 3 *GAUI* is a long non-coding RNA.** (A) Predicted ORFs of *GAUI*, the blue and gray box shows the predicted ORFs. (B) Predicted coding potential of *GAUI*. (C) *GALNT8*, *GAUI*(predicted ORF-1 and ORF-2), and *lnc-HOTAIR* (predicted ORF) were cloned, respectively, into pcDNA3.1(+) with C-terminal EGFP-tag. (D) IF analysis of the EGFP expression in SK-N-AS cells transfected with the indicated constructs. Scale bars, 100 $\mu$ m. (E) Western blot analysis of the recombinant protein by anti-EGFP tag. (F) Diagram of the GFP fusion constructs used for transfection. The start codon ATGGTG of the GFP (GFPwt) gene is mutated to ATTGTT (GFPmut). (G-H) The indicated constructs were transfected into SK-N-AS cells for 24 hr, (G) GFP fluorescence and the GFP fusion protein levels were determined by western blotting with (H) anti-GFP antibodies.

**Supplementary Figure 4 The promoter region of *GAUI* and *GALNT8*.** (A)

Schematic of the luciferase assay of the *GAUI/GALNT8* cluster. **(B)** The first exon of *GAUI* and *GALNT8* presents luciferase activity in opposite directions. The full-length 5' to 3' sequence and its opposite sequence were used as a positive control (line a, b). The untreated group and empty vector group served as negative control groups. The first exon of *GLANT8* presented the same transcription direction as *GAUI* (line g, h), and the first exon of *GAUI* exhibited the same transcription direction as *GLANT8* (line c, d). The gap presented neither forward nor reverse transcriptional activity (line e, f). **(C)** Schematic of the dCas9-KRAB target of the *GAUI/GALNT8* cluster. **(D)** Real-time PCR was performed to validate the knockdown efficiency in Y79, WERI-Rb1 and SK-N-AS cells. **(E)** Western blot assay was used to examine *GALNT8* knockdown efficiency by two different shRNA.

**Supplementary Figure 5 The *GAUI* or *GALNT8* overexpression in normal cells.**

**(A)** Realtime-PCR was performed to test *GAUI* expression after transfecting pcDNA3.1-*GAUI* in RPE1 and ARPE19. **(B)** Western blot was performed to examine *GALNT8* expression after transfecting pcDNA3.1-*GALNT8* in RPE1 and ARPE19. **(C)** CCK8 assay was performed to measure proliferative rate after *GAUI* or *GALNT8* overexpression in normal cells. **(D)** A colony formation assay was performed to assess normal cell (ARPE19 and RPE1) growth with *GAUI* and *GALNT8* over-expressing. Quantification of visible colonies. The colony number of the pcDNA3.1 group was set to 1. **(E, F)** A CCK8 assay was performed to assess normal cell (ARPE19 and RPE1) growth with *GAUI* and *GALNT8* over-expressing. All the experiments were performed in triplicate, and the relative colony formation rates are shown as mean  $\pm$  SEM. \*p <

0.05. pcDNA3.1: negative control group transfected with empty pcDNA3.1 vector.

**Supplementary Figure 6 The *GAUI* or *GALNT8* overexpression in Y79, WERI-RB1 and SK-N-AS.** (A) Realtime-PCR was performed to test *GAUI* expression after transfecting pcDNA3.1-*GAUI* in Y79, WERI-RB1, and SK-N-AS. (B) Western blot was performed to examine *GALNT8* expression after transfecting pcDNA3.1-*GALNT8* in RPE1 and ARPE19. (C) CCK8 assay was performed to measure proliferative rate after *GAUI* or *GALNT8* overexpression in tumor cells. (D) A soft-agar tumor formation assay was performed to determine the colony formation ability of *GAUI* or *GALNT8* overexpressed tumor cells (Y79, WERI-Rb1 and SK-N-AS). (E) Quantification of visible colonies. The colony number in the empty vector group was set as 100%. All the experiments were performed in triplicate, and the relative colony formation rates are shown as the mean  $\pm$  SEM. \*P<0.05. pcDNA3.1: negative control group transfected with empty pcDNA3.1 vector.

**Supplementary Figure 7 *GAUI* siRNA interference efficiency by the three siRNA sequences in tumor cells.** (A-C) Real-time PCR was performed to validate the siRNA knockdown efficiency in Y79, WERI-Rb1 and SK-N-AS cells. The control group was set to 1. The 2<sup>nd</sup> and the 3<sup>rd</sup> siRNA sequence presented significant knockdown efficiency. Con: no siRNA was transfected. NC siRNA: transfected with controlled scramble siRNA. \*P<0.05.

**Supplementary Figure 8 Localization of *GAUI* expression.** (A) RT-PCR analysis of the nuclear fraction. *GAUI* was mainly expressed in the nucleus. *GAPDH* and *U2* RNA

served as positive controls for the cytoplasmic and nuclear fractions, respectively. **(B, C)** RT-PCR analysis of *GAUI* and *GALNT8* expression after knocking down *GAUI* in tumor cell lines by sgRNAs **(B)** or siRNAs **(C)**. Empty vector: negative control group transfected with the empty dCas9-KRAB vector. sgRNA1 and sgRNA2: the first and second sequences used with the dCas9-KRAB system to knock out *GAUI*. \*P<0.05. **(D)** RT-PCR analysis of *GAUI* and *GALNT8* expression after overexpression *GAUI* in normal cell lines. \*P<0.05, \*\*P<0.01.

**Supplementary Figure 9 Overexpression of *GAUI* promoted *GALNT8* in tumor cells.** **(A, B)** RT-PCR **(A)** and real-time PCR **(B)** confirmed that *GAUI* was overexpressed after transfecting with pcDNA3.1-*GAUI* plasmid, while *GAUI* remained unchanged after transfecting with pcDNA3.1-*GALNT8* in tumor cells. **(C)** Western blot showed that *GALNT8* was upregulated after overexpression of *GAUI* in tumor cells. pcDNA3.1-*GALNT8* was conducted as positive control. **(D)** RT-PCR analysis of *GAUI* and *GALNT8* expression after overexpression *GAUI* in tumor cell lines. \*P<0.05.

**Supplementary Figure 10 ChIRP analysis of *GAUI*-interacting proteins.** **(A)** The protein peptides isolated by ChIRP. The lncRNA *U2* was selected as the normal control, and scrambled oligos were selected as negative controls. **(B)** RNA-ChIP analysis of the binding of *GAUI* with MCM2, TCEA1, RBMX, and CBX3. IgG antibody and *U2* RNA was used as negative controls.

**Supplementary Figure 11 TCEA1 is recruited to the *GALNT8* promoter.** **(A)**



Schematic of sites in the *GALNT8* promoter as detected using the ChIP assay. **(B, C)** RT-PCR examination of the binding of *TCEA1* to the *GALNT8* promoter using samples from the ChIP assay.

**Supplementary Figure 12 TCEA1 binds to *GAUI* promoter in tumor cells.** **(A)**

Schematic of sites in the *GALNT8* and *GAUI* promoter in the ChIP assay. **(B-E)** TCEA1 binds to *GAUI* promoter in tumor. **(B)** *GAUI* promoter was selected as target loci and a distal site was choosing as negative site. Non-selective antibody IgG was selected as negative control and the total cellular DNA (input) was referred to positive control. RT-PCR examination of the interaction between TCEA1 and *GAUI* promoter in the ChIP assay. **(C)** Quantification of the binding of TCEA1 to the *GAUI/GALNT8* cluster in ChIP assay. **(D-E)** Negative site presented no TCEA1 binding. The value obtained for IgG group cells was set to 1. All the experiments were performed in triplicate and are presented as mean  $\pm$  SEM. \*P<0.05, \*\*p < 0.01.

**Supplementary Figure 13 Global TCEA1 expression analysis.** **(A)** Global

expression levels of TCEA1 in tumor cell lines (Y79, WERI-Rb1, SK-N-AS) and normal cell lines (HSC, ARPE19) were measured by Western blot. **(B)** Global expression levels of TCEA1 were measured by Western blot in *GAUI* knockdown tumor cells.

Supplementary Figure 1

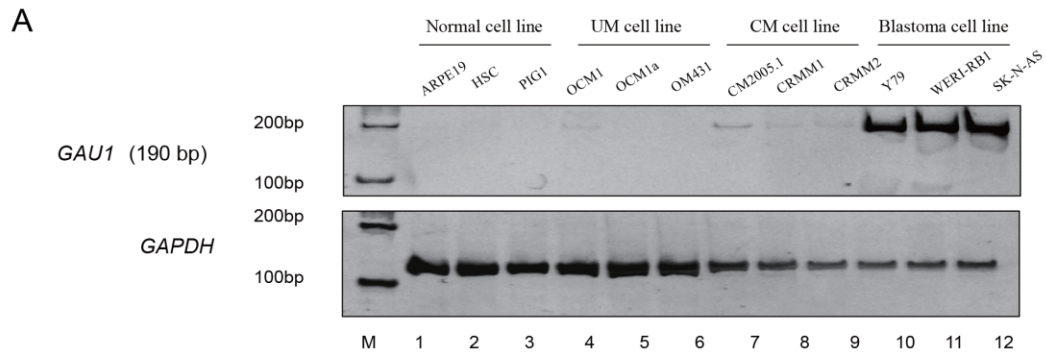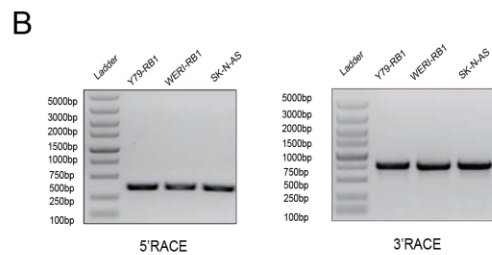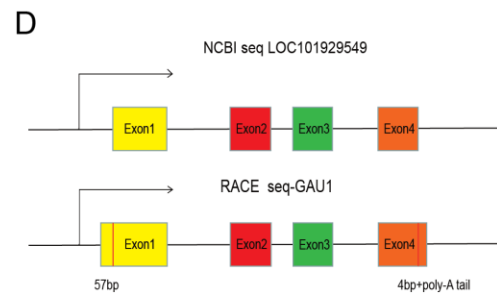

**C**

*GAU1* Full length Sequence:

```

GTGGAGCCCAGAGCTCTGGGCCGTGAGCAAGCCTCCAACGCTCTGGTCCCCTGG
ACCTGCCTTTTAAACGCTTGTTCTGTCTCTTTCTAACTCCTTTGTCTCCGCCGACT
CGGGGTATCCGCTGGGTGGTGTGGGGCTGGTTTCCCAACAGCTTTCTCTCCACC
CAGCTTCATAGATGACACCCTGCCTGCTAGGCCAGATGTTCTCCGGCCAAGAACA
CTATTATAGCTGCCTGGCTTCTCCCTGAGCAGCGTCAGGTGTGAGGAGTGCGCAT
GGCAGCTGCCAGTGACAGATGGAATCTCCCTCTCTACCCAGGCTGGAGTGCAA
TGGACAATCAGCTCACTGCAACCTCCACCTCCCGGGTTCAAGTGATTCTTCTGCC
TCAGCCTCCCGAGTAGCTGGGACTACAGCCTTCATTTCAAGTCAACAACCACATAAC
AGATCATCAAAATACATAAAGCAAACTGACAGAATAAAGTTAAATATACATATCT
ACAATTATGGAGAGAATAACAACAAAAAATAGAACAAAAATGTTCCACGCCCTTG
GTCAATGGTACCACCAGCCAGCGAGGTTCCCAAGCCAAGAAGTTCGGAAGCATCCG
TGATTCTTCATCTTCCACATCCACTTTATCACCGGAAGCACGCATTCAACTTTCTAAA
CATCCCTCAGACTGACCCACATCTTTCTATCCACTTTTACATCTTGCTTGAATGACT
TCCCAGGCCAGCCAGTCTCCCGCCTCCAGCTCCGCCCCCTTCTGACTCCCTTTAT
GTGGTACAATCAGAGAGCCCTTCCCAAAGCACAAATCTGCTTCACTGCTTTGCTTC
AAGCCCTTTCGTGGCTCCTATTTCCAGCTGGATGAGGTCCAAGCCTCTTAACGTGCT
GTACGTGTACATGCCTGACCCCGCTACTTGACCAGCCAAGTTTCTTCATAGCGCTG
TGCTTTTGTTCCTCCTGCCTAGAATGTCCCTTCCCTTTTCTCGCTTCATGGTGTGC
CAAACCTCCTATCCTGTGAGATCCAGCTTACACGTCAGCTTCCCCGTGATGCTTTTCC
TAACTCCCTATTCAGCCAGTGAAGTGCTCCCTGCGTTCATGTGGCTTGTATCTCT
GTAAAAGCTCCACAGAGCTGTTTTAATTATCCGTTAATGTACATGTCTTCCCACTA
GACTTTTGTCTCTTAAAGTATCTCCTTCATCTCTGCTTTGCATAACCTAACAGAGTT
CAACACATAGGAGTGTTTAATAAATGCTGATTAATAAATAATTAATAAACAAATGAAA
CAATACAGCAAAAAAAAAAAAAAAAAAAAAAAAAAAAAAAAAAAAAAAAAA
    
```

Supplementary Figure 2

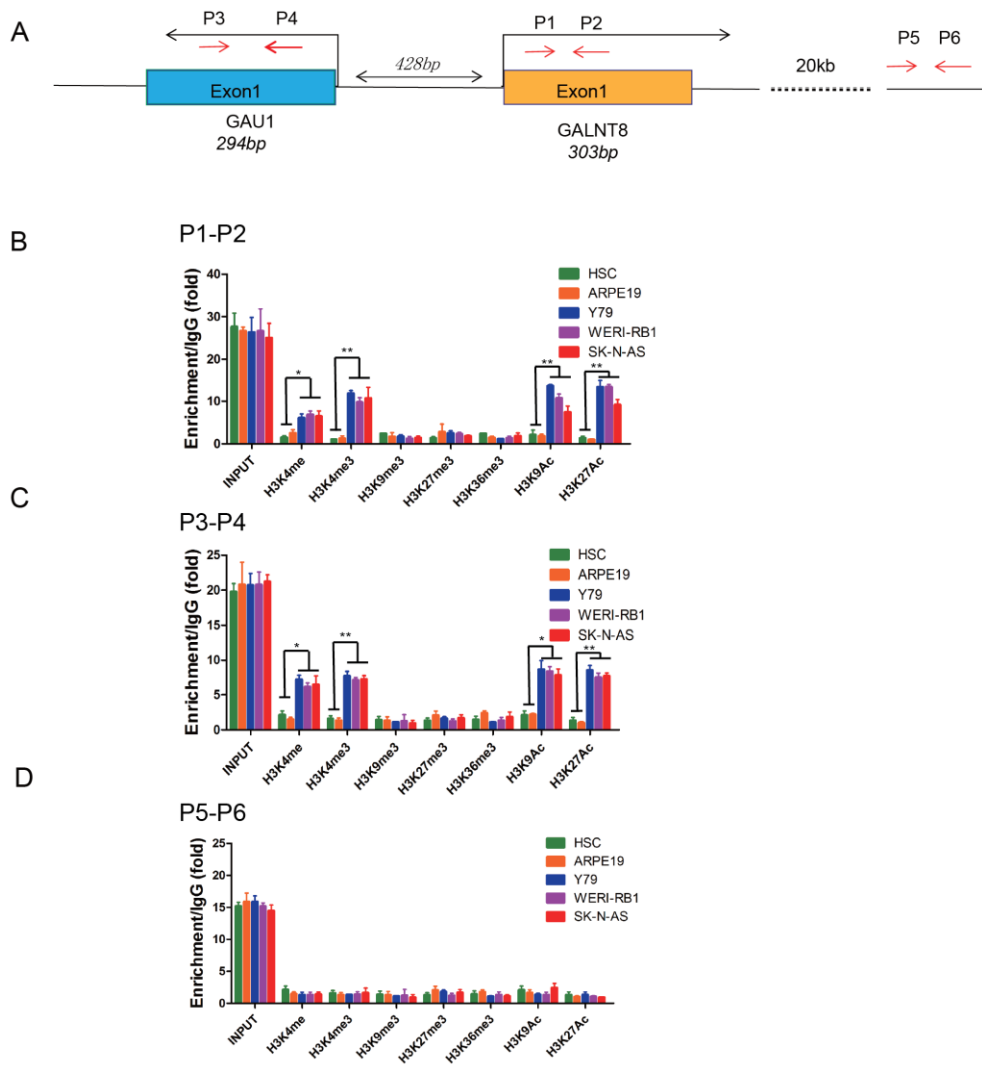

Supplementary Figure 3

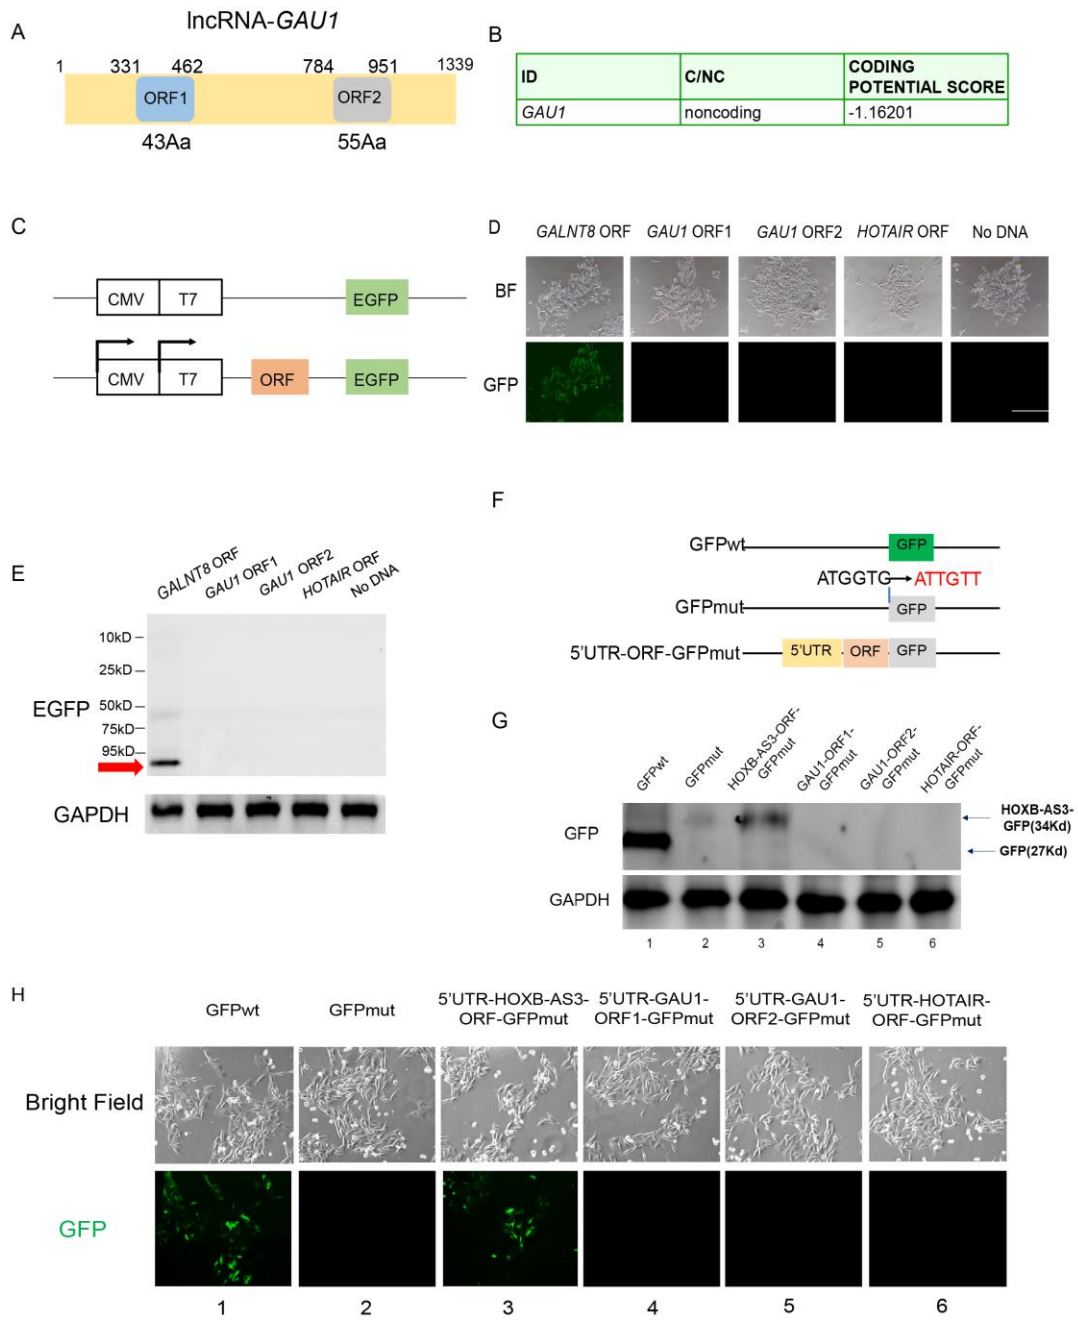

Supplementary Figure 4

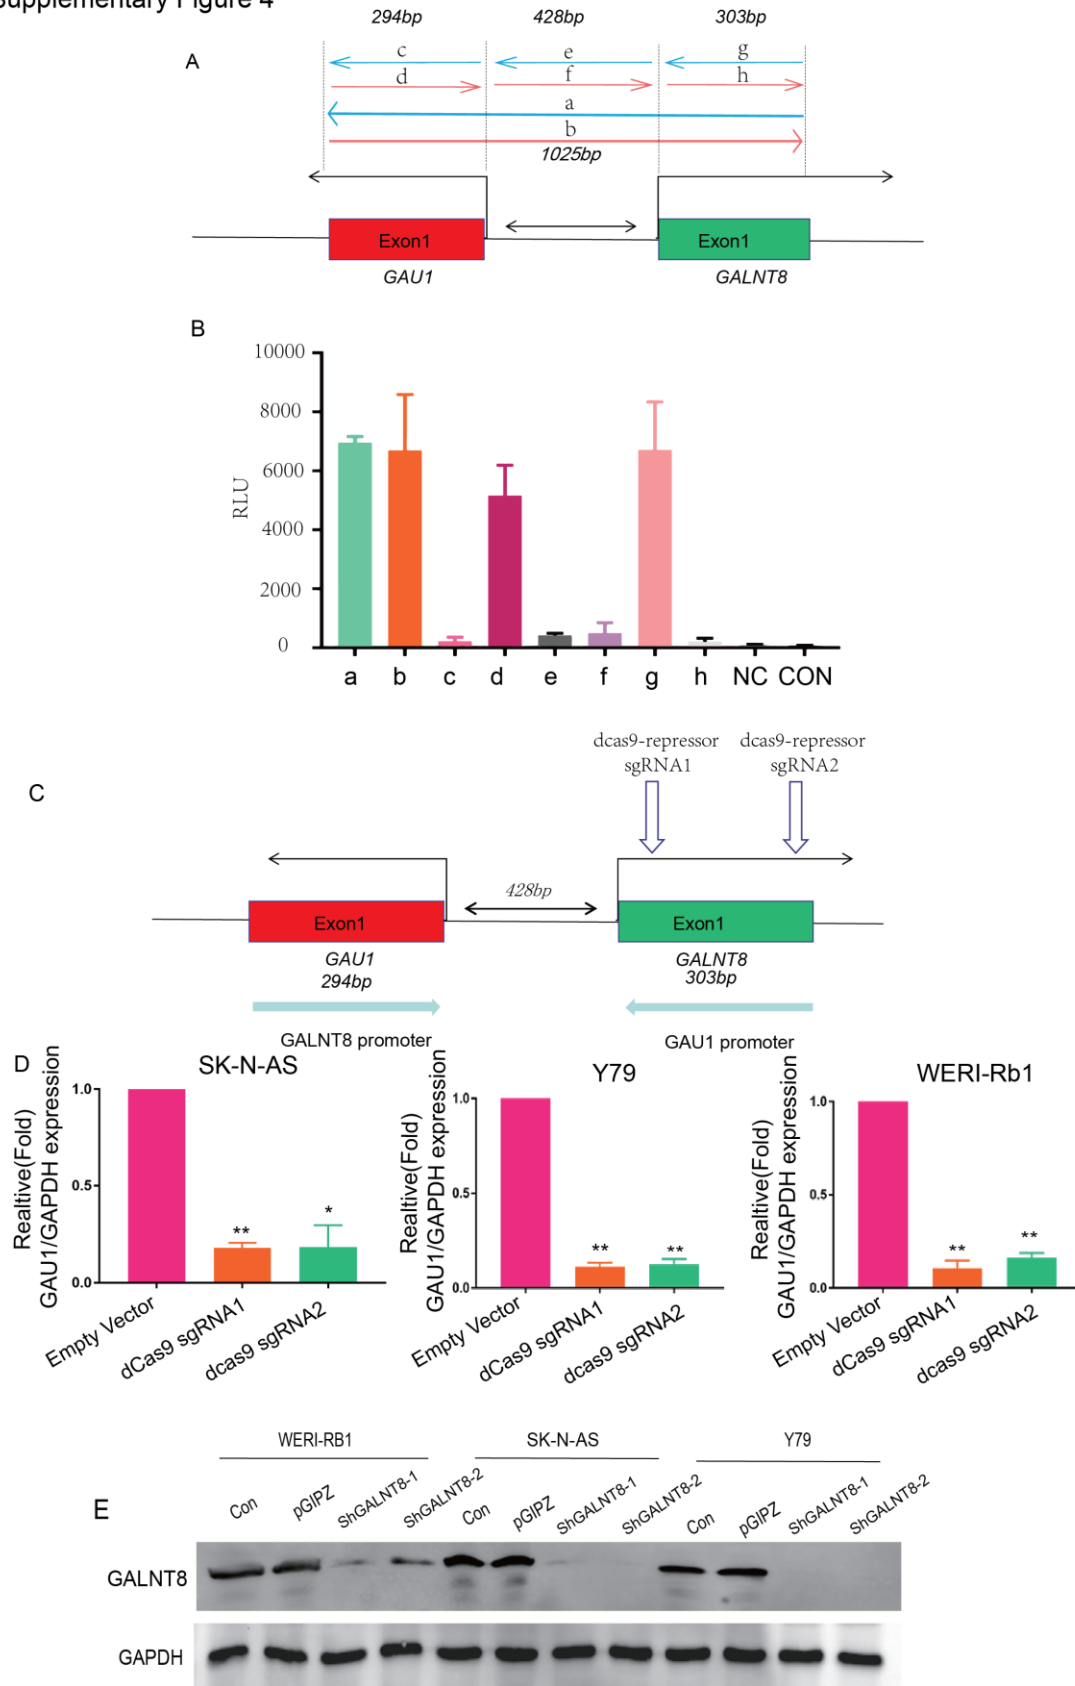

Supplementary Figure 5

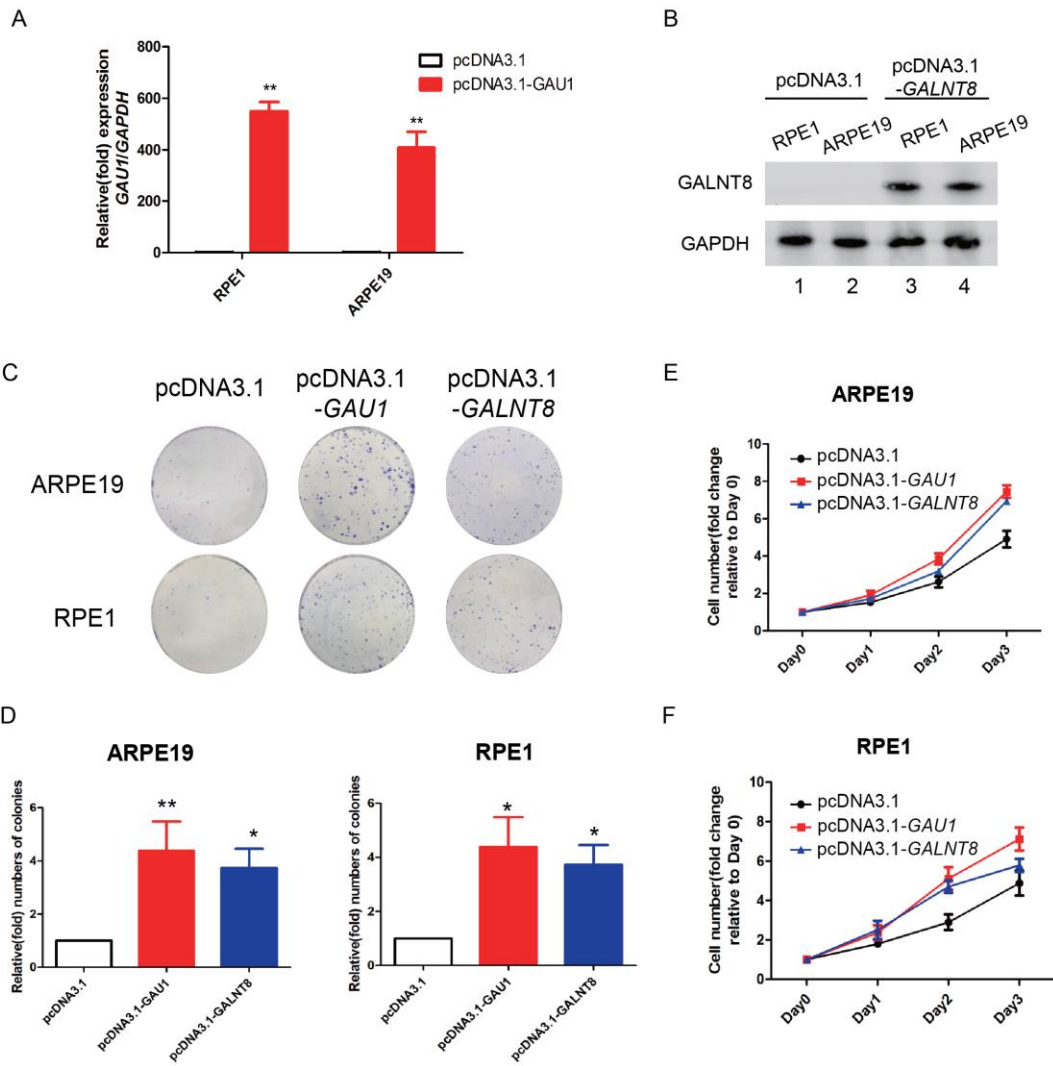

Supplementary Figure 6

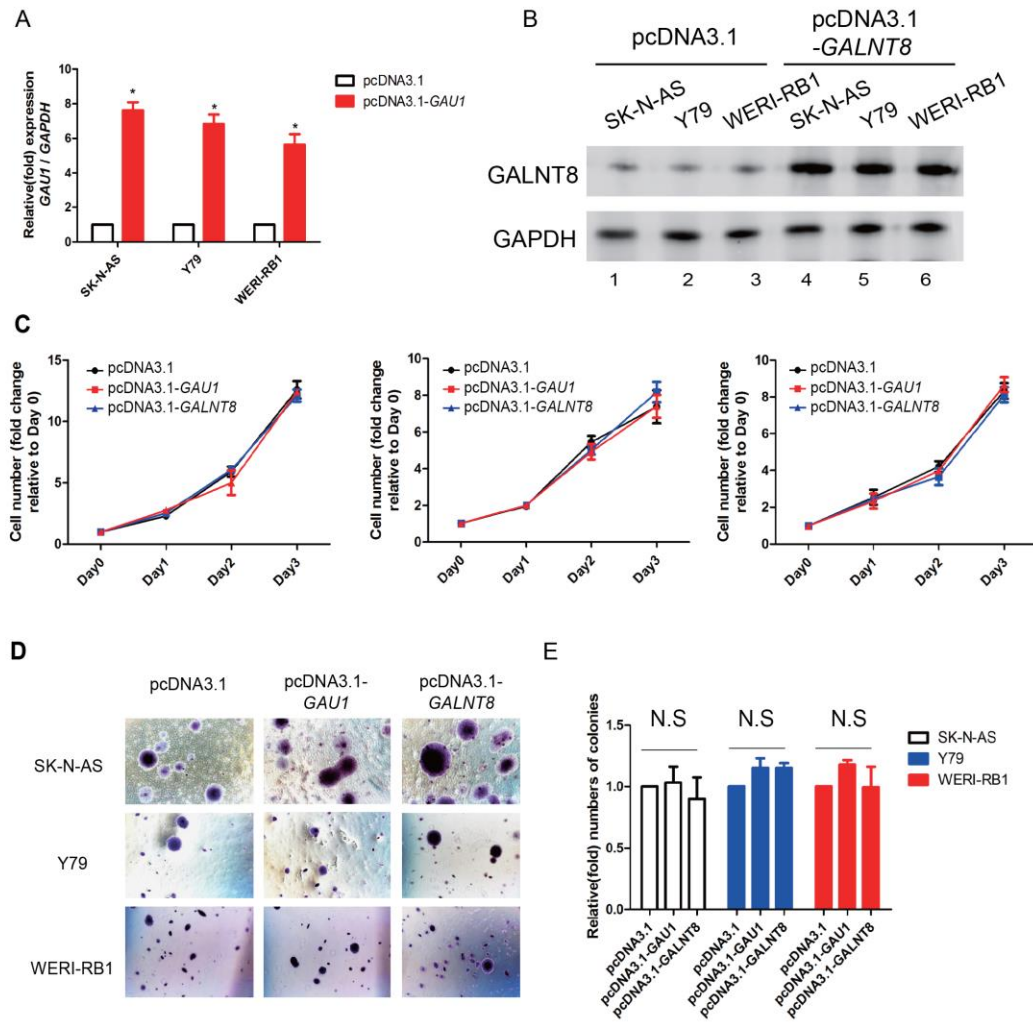

Supplementary Figure 7

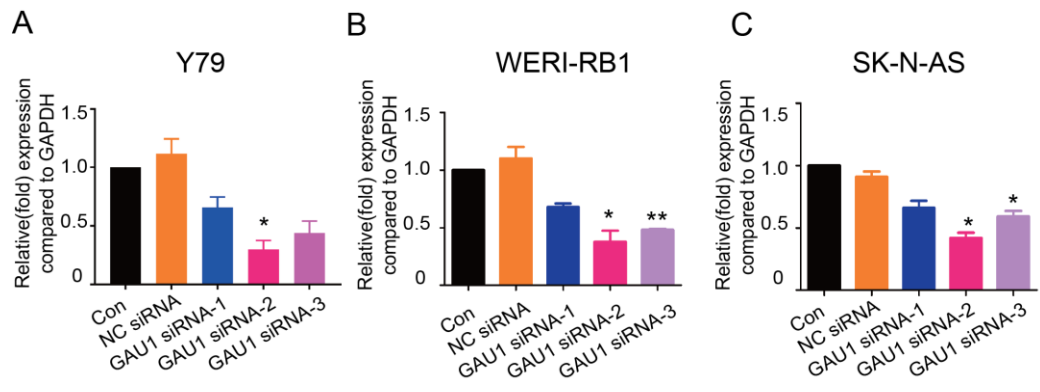



Supplementary Figure 8

A

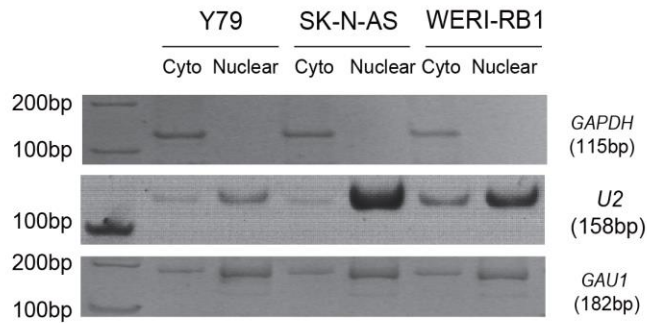

B

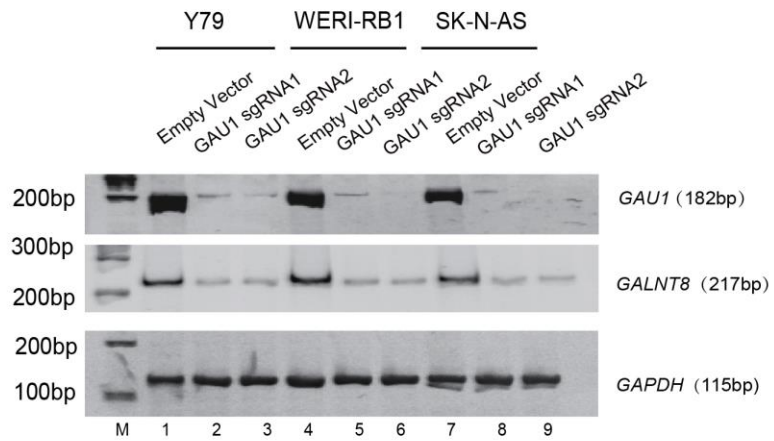

C

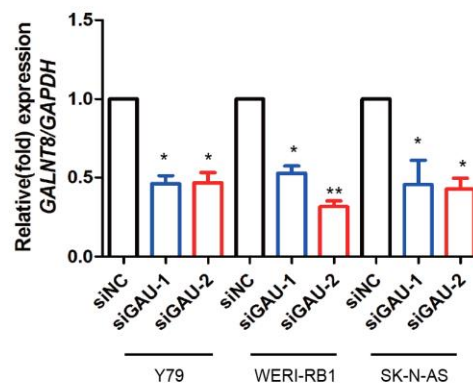

D

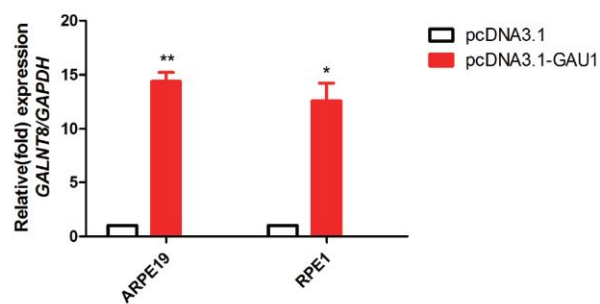

Supplementary Figure 9

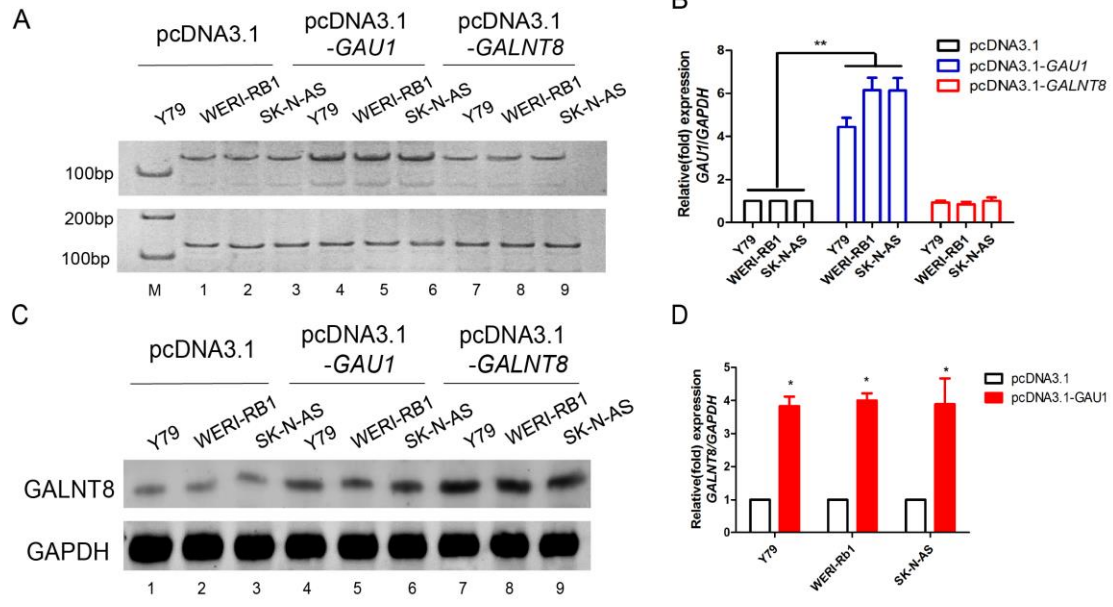

A

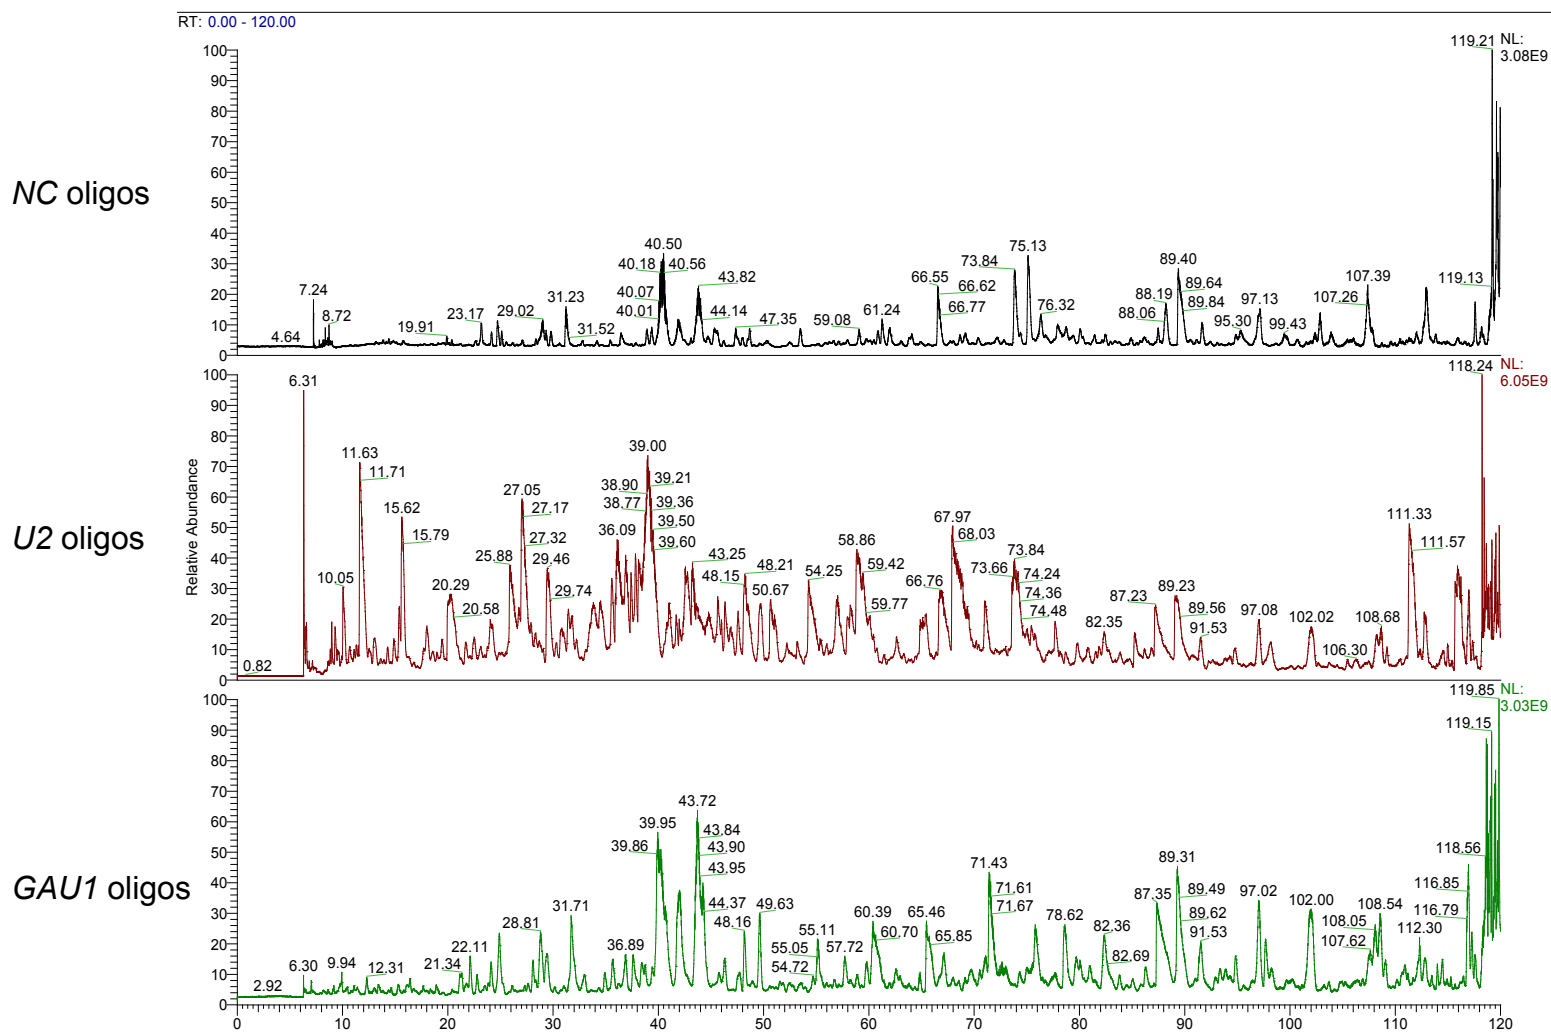

B

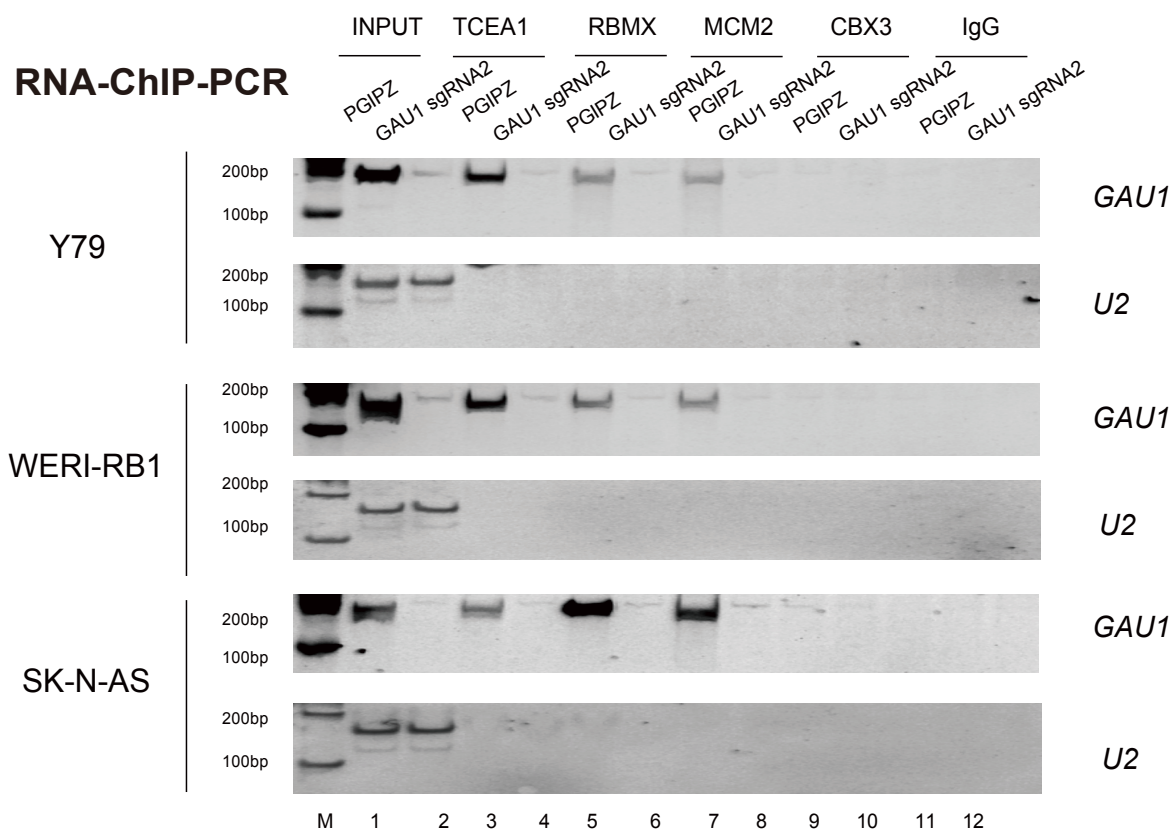

# Supplementary Figure 11

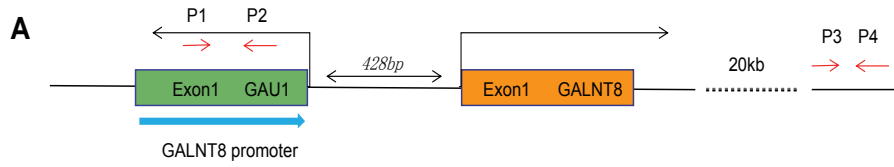

**B**

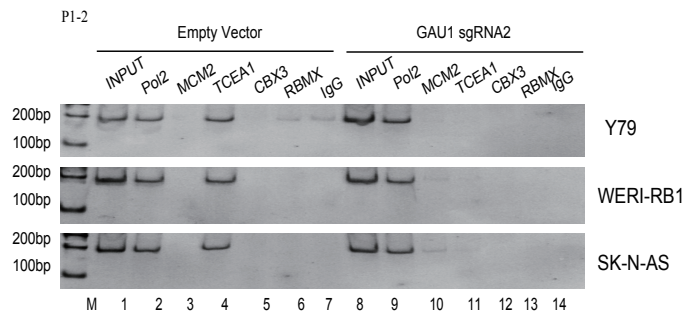

**C**

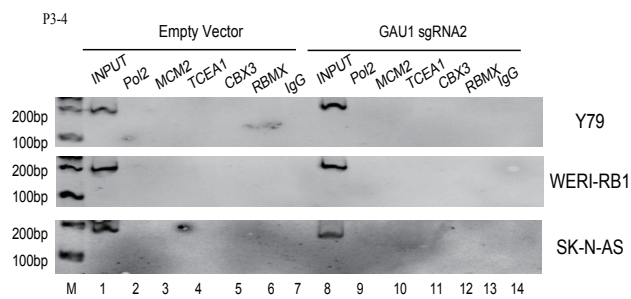

# Supplementary Figure 12

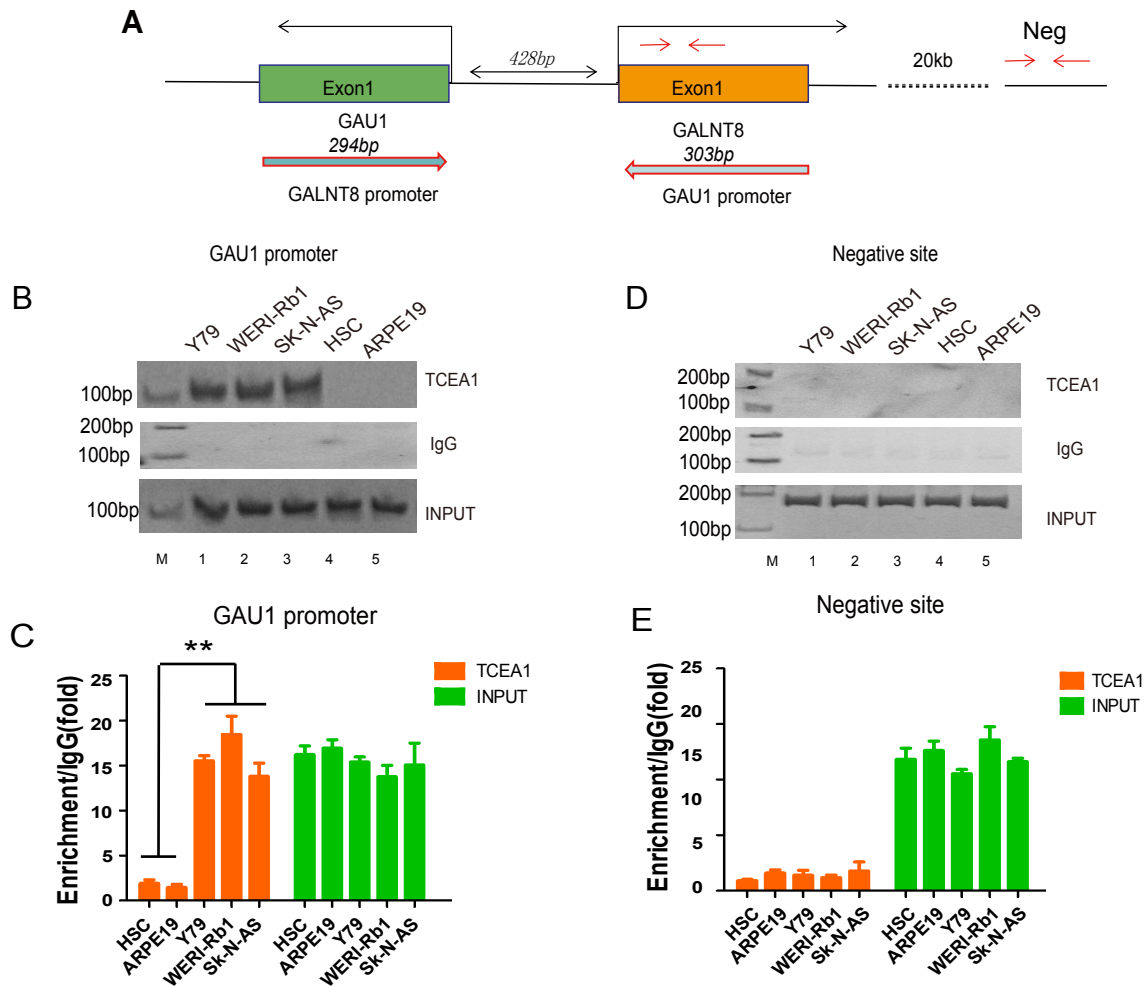

# Supplementary Figure 13

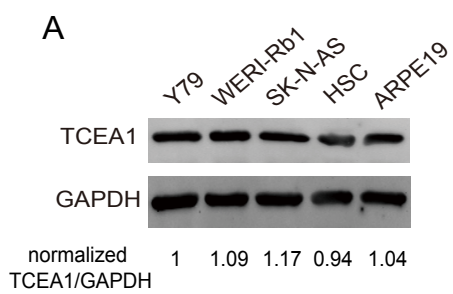

**B**

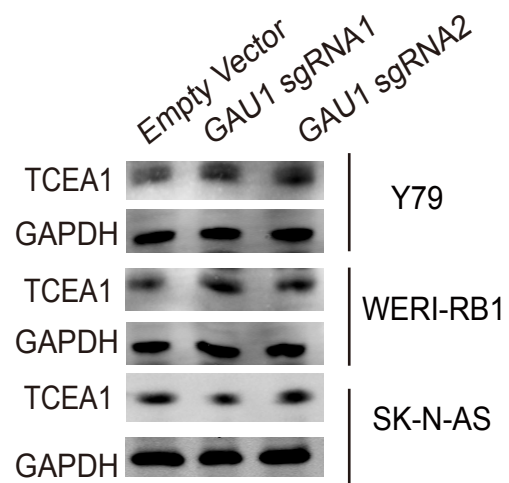

**Supplemental Table 1:** Primers, oligos, shRNAs, siRNAs and sgRNAs used in the experiment.

|                         | PCR                                                |
|-------------------------|----------------------------------------------------|
| GAU1 primer set1        | TATCACCGGAAGCACGCATT<br>TTTGTGCTTTGGGAAGGGCT       |
| GAU1-2 primer set2      | AGCCCTTCCCAAAGCACAAA<br>AGAGGCTTGGACCTCATCCA       |
| GALNT8                  | TCCCACAAAAGCTAGGCTGG<br>GTGGAGACCACCCGTAAACA       |
| GALNT8-FAIRE            | TCCCACAAAAGCTAGGCTGG<br>CATCTTCTTCTGGGGGTCG        |
| GAU1-FAIRE              | CTGACCCCCGCTACTTGAC<br>TACAAGCCACATGGGAACGC        |
| KCNA6-FAIRE             | GGCTCCTGTCATCCTCTTCG<br>ACACTGCGGACTCTGTTCCA       |
| DYRK4-FAIRE             | TACGACGTGGCCATTGACAT<br>GCTGCTCCACCTCATTCTCC       |
| AKAP3-FAIRE             | AGGAGGTTTCATTGGCAGGAA<br>CGAGGACCTGATCGTGTCTG      |
| GLANT8<br>promoter-ChIP | TAGATGACACCCTGCCTGCTA<br>CAAGCATTCTTCTGACTTCTGAGAC |
| GAU1 promoter-ChIP      | CCACAAAAGCTAGGCTGGTTC<br>TCTTCTTCTGGGGGTCGTC       |
| Negative probes-ChIP    | GGAGCCATTGTATGTCGTGC<br>ACCCCAAAGTCCTACCCAGT       |
| Intergenic region-ChIP  | TTCTTAGGGCAGATGGGAAGG<br>GGAGATAAACAACCTTGAAGCAG   |
| GAPDH-promoter-ChIP     | TCGGAGTCAACGGGTGAGTT<br>CTACCCTGCCCCATACGA         |
| RP                      | TCCAAAATCAAGTGGGGCGA<br>TGATGACCCTTTTGGCTCCC       |
| GAPDH primer set1       | GGGAGCCAAAAGGGTCATCA<br>TGGTCATGAGTCCTTCCACG       |
| GAPDH primer set2       | TCCGACCCGAGAAAGACAAA<br>CGTCTGTGCACTGTTTTGGG       |
| U2                      |                                                    |
|                         | siRNA                                              |
| siGALNT8-1              | CUCGAUUGUUGAAGGAAAUdTdT                            |
| siGALNT8-2              | GCUCACAGAAUGUCUACUAdTdT                            |
| siGAU1-1                | CAGACAUGCACUCCAUGUdTdT                             |

|              |                                                                                                                     |
|--------------|---------------------------------------------------------------------------------------------------------------------|
| siGAU1-2     | GACACAGAAAAGUCACACAdTdT                                                                                             |
| siGAU1-3     | CAGCAUUGAAAUUGAUCAAdTdT                                                                                             |
| dCas9 SgRNA  |                                                                                                                     |
| GAU1 SgRNA1  | ACATCTGAATAAACGCTACG                                                                                                |
| GAU1 SgRNA2  | TGTGGAGACCACCCGTAAAC                                                                                                |
| RNA-FISH     |                                                                                                                     |
| GAU1 oligos  | GATGTGGGTCAGTCTGAGGGATGTTTAGAAAGTTGAATG<br>CGTGC                                                                    |
| ChIRP-probes |                                                                                                                     |
| GAU1 probes  | ATCTATGAAGCTGGGTGGAG<br>GTGAGAGAGGGAGATTCCAT<br>GTTGTTGACTGAAATGAAGG<br>GCGCTATGAAGAACTTGGC<br>AGAGATACAAGCCACATGGG |



**Supplementary Table 2. The clinical characteristics of retinoblastoma patient cohorts.**

| Features   | Retinoblastoma | Unaffected |
|------------|----------------|------------|
| Numbers    | 10             | 18         |
| Sex        |                |            |
| Male       | 6              | 8          |
| Female     | 4              | 10         |
| Age        | 4.7±2.09       | 9.28±8.80  |
| ICRB group |                |            |
| A stage    | 0              | /          |
| B stage    | 0              | /          |
| C stage    | 0              | /          |
| D stage    | 0              | /          |
| E stage    | 10             | /          |
| Laterality |                |            |
| Unilateral | 3              | /          |
| Bilateral  | 7              | /          |

**Supplementary Table 3. The clinical characteristics of neuroblastoma patient.**

| Features      | Neuroblastoma |
|---------------|---------------|
| Numbers       | 8             |
| Sex           |               |
| Male          | 5             |
| Female        | 3             |
| Age           | 2.57±3.59     |
| INSS stage    |               |
| I stage       | 0             |
| IIA stage     | 0             |
| IIB stage     | 1             |
| III stage     | 4             |
| IV stage      | 2             |
| IVS stage     | 1             |
| Origins       |               |
| Adrenal gland | 4             |
| Chest         | 2             |
| Abdominal     | 2             |
| pelvic        | 0             |

Supplementary Table 4 ChIRP-MS identified lncRNA *GAU1* specifically binding proteins

| Gene         | Number.of.<br>proteins | Score  | iBAQ.NC | iBAQ.U2  | iBAQ.GAU1 | Unique.<br>peptides<br>.NC | Unique.<br>Peptides<br>.U2 | Unique.<br>peptides<br>.GAU1 | Rank.NC | Rank.U2 | Rank.GAU1 |
|--------------|------------------------|--------|---------|----------|-----------|----------------------------|----------------------------|------------------------------|---------|---------|-----------|
| RPL35        | 4                      | 31.389 | 0       | 5898700  | 5136500   | 0                          | 3                          | 4                            | 1126.5  | 297     | 63        |
| CRABP2       | 2                      | 40.98  | 0       | 0        | 4301100   | 0                          | 0                          | 5                            | 1126.5  | 1486    | 80        |
| RPLP2        | 3                      | 17.782 | 0       | 334750   | 2414900   | 0                          | 1                          | 2                            | 1126.5  | 1074    | 149       |
| RPL9         | 9                      | 30.655 | 0       | 230610   | 2297200   | 0                          | 1                          | 4                            | 1126.5  | 1159    | 155       |
| COX5A        | 4                      | 11.418 | 0       | 0        | 2207800   | 0                          | 0                          | 2                            | 1126.5  | 1486    | 160       |
| RPL23        | 9                      | 51.091 | 0       | 7457600  | 2062500   | 0                          | 7                          | 3                            | 1126.5  | 250     | 174       |
| SDHC         | 8                      | 20.475 | 0       | 13505000 | 1001400   | 2                          | 2                          | 2                            | 1126.5  | 146     | 259       |
| RPL14        | 3                      | 83.327 | 0       | 1708500  | 980580    | 0                          | 1                          | 2                            | 1126.5  | 616     | 264       |
| ILF3         | 29                     | 323.31 | 63561   | 38552000 | 781660    | 2                          | 37                         | 7                            | 541     | 65      | 293       |
| <b>CBX3</b>  | 5                      | 85.478 | 0       | 64116000 | 581100    | 0                          | 5                          | 2                            | 1126.5  | 40      | 340       |
| PSMA3        | 6                      | 12.308 | 0       | 0        | 521320    | 0                          | 0                          | 2                            | 1126.5  | 1486    | 352       |
| GDI2         | 17                     | 55.315 | 44407   | 2062600  | 500250    | 1                          | 8                          | 4                            | 558     | 561     | 359       |
| PSMD4        | 4                      | 10.605 | 0       | 0        | 497850    | 0                          | 0                          | 2                            | 1126.5  | 1486    | 361       |
| <b>RBMX</b>  | 13                     | 323.31 | 0       | 49578000 | 491700    | 0                          | 14                         | 4                            | 1126.5  | 55      | 363       |
| CAPRIN1      | 7                      | 11.88  | 0       | 0        | 479360    | 0                          | 0                          | 2                            | 1126.5  | 1486    | 365       |
| PSME3        | 15                     | 19.98  | 0       | 681560   | 466600    | 0                          | 2                          | 2                            | 1126.5  | 883     | 371       |
| ERH          | 3                      | 304.83 | 0       | 28750000 | 414450    | 1                          | 7                          | 2                            | 1126.5  | 83      | 396       |
| TPM3         | 78                     | 43.009 | 0       | 0        | 367110    | 1                          | 0                          | 4                            | 1126.5  | 1486    | 410       |
| SURF4        | 9                      | 12.216 | 0       | 749910   | 313140    | 0                          | 1                          | 2                            | 1126.5  | 854     | 440       |
| WARS         | 6                      | 17.012 | 0       | 0        | 297600    | 0                          | 0                          | 3                            | 1126.5  | 1486    | 449       |
| HSD17B10     | 5                      | 49.127 | 0       | 2147100  | 294620    | 0                          | 5                          | 2                            | 1126.5  | 552     | 452       |
| ATP6V1B2     | 6                      | 10.626 | 0       | 0        | 276270    | 0                          | 0                          | 2                            | 1126.5  | 1486    | 467       |
| PSMD12       | 3                      | 11.546 | 0       | 0        | 270070    | 0                          | 0                          | 2                            | 1126.5  | 1486    | 471       |
| SF3A3        | 6                      | 83.198 | 0       | 2927600  | 243540    | 0                          | 6                          | 2                            | 1126.5  | 476     | 483       |
| EIF2S3       | 5                      | 57.762 | 0       | 1215700  | 207880    | 1                          | 6                          | 4                            | 1126.5  | 710     | 502       |
| PRPF19       | 5                      | 261.49 | 0       | 26712000 | 206570    | 0                          | 16                         | 2                            | 1126.5  | 92      | 503       |
| ASNS         | 4                      | 11.27  | 0       | 0        | 198020    | 0                          | 0                          | 2                            | 1126.5  | 1486    | 508       |
| NARS         | 9                      | 16.416 | 0       | 0        | 190440    | 0                          | 0                          | 3                            | 1126.5  | 1486    | 514       |
| H1FX         | 1                      | 221.17 | 0       | 64014000 | 188630    | 0                          | 13                         | 2                            | 1126.5  | 41      | 516       |
| EWSR1        | 17                     | 173.22 | 0       | 11528000 | 184760    | 0                          | 8                          | 2                            | 1126.5  | 175     | 519       |
| HIST1H1C     | 1                      | 45.429 | 0       | 0        | 182730    | 3                          | 4                          | 4                            | 1126.5  | 1486    | 521       |
| UQCRC1       | 2                      | 11.407 | 0       | 0        | 182360    | 0                          | 0                          | 2                            | 1126.5  | 1486    | 523       |
| CDC2         | 8                      | 33.745 | 0       | 1194800  | 181880    | 0                          | 3                          | 2                            | 1126.5  | 717     | 525       |
| RCC2         | 3                      | 317.84 | 0       | 23684000 | 181290    | 0                          | 21                         | 3                            | 1126.5  | 97      | 526       |
| XRCC6        | 8                      | 211.92 | 0       | 9596000  | 179710    | 0                          | 21                         | 3                            | 1126.5  | 209     | 528       |
| TRAP1        | 12                     | 41.852 | 0       | 309870   | 161610    | 0                          | 3                          | 3                            | 1126.5  | 1090    | 544       |
| YWHAH        | 7                      | 20.275 | 0       | 0        | 153100    | 0                          | 1                          | 3                            | 1126.5  | 1486    | 556       |
| IVD          | 5                      | 12.096 | 0       | 0        | 137750    | 0                          | 0                          | 2                            | 1126.5  | 1486    | 571       |
| PPP2R1A      | 19                     | 22.643 | 0       | 163090   | 136130    | 0                          | 1                          | 3                            | 1126.5  | 1217    | 576       |
| <b>TCEA1</b> | 11                     | 25.136 | 0       | 330570   | 130530    | 0                          | 3                          | 2                            | 1126.5  | 1076    | 584       |
| ALDOC        | 14                     | 10.81  | 0       | 0        | 129940    | 0                          | 0                          | 2                            | 1126.5  | 1486    | 589       |
| ACAT1        | 4                      | 11.127 | 0       | 0        | 117290    | 0                          | 0                          | 2                            | 1126.5  | 1486    | 598       |
| SF3B2        | 9                      | 323.31 | 0       | 17072000 | 112070    | 0                          | 26                         | 2                            | 1126.5  | 123     | 604       |
| DLST         | 11                     | 11.298 | 0       | 0        | 108520    | 0                          | 0                          | 2                            | 1126.5  | 1486    | 606       |
| 9-Sep        | 14                     | 12.388 | 0       | 0        | 107210    | 0                          | 0                          | 2                            | 1126.5  | 1486    | 608       |
| PYCR1        | 26                     | 29.776 | 0       | 0        | 106940    | 1                          | 0                          | 2                            | 1126.5  | 1486    | 609       |
| <b>MCM2</b>  | 6                      | 158.37 | 0       | 3664500  | 99237     | 0                          | 17                         | 3                            | 1126.5  | 420     | 616       |
| SLC25A11     | 4                      | 15.164 | 0       | 0        | 99191     | 1                          | 0                          | 2                            | 1126.5  | 1486    | 617       |
| PKM2         | 14                     | 13.475 | 0       | 0        | 93292     | 0                          | 0                          | 2                            | 1126.5  | 1486    | 623       |
| PTBP2        | 10                     | 10.852 | 0       | 0        | 92592     | 0                          | 0                          | 2                            | 1126.5  | 1486    | 625       |
| PSIP1        | 5                      | 285    | 0       | 22631000 | 92129     | 0                          | 20                         | 2                            | 1126.5  | 99      | 626       |
| LARS         | 16                     | 16.221 | 0       | 0        | 65822     | 0                          | 0                          | 3                            | 1126.5  | 1486    | 655       |
| PSMD11       | 4                      | 12.656 | 0       | 0        | 62709     | 1                          | 0                          | 2                            | 1126.5  | 1486    | 659       |
| NPEPPS       | 12                     | 12.221 | 0       | 0        | 57453     | 0                          | 0                          | 2                            | 1126.5  | 1486    | 665       |
| MTHFD1       | 4                      | 61.478 | 0       | 810100   | 56238     | 0                          | 9                          | 2                            | 1126.5  | 826     | 669       |
| NOP58        | 5                      | 316.75 | 0       | 32196000 | 50186     | 0                          | 22                         | 2                            | 1126.5  | 77      | 674       |
| GART         | 12                     | 30.236 | 0       | 167940   | 41956     | 0                          | 3                          | 2                            | 1126.5  | 1211    | 679       |
| SF3B3        | 11                     | 323.31 | 0       | 9955500  | 25174     | 0                          | 29                         | 3                            | 1126.5  | 207     | 694       |
| SNRNP20C     | 11                     | 323.31 | 0       | 18515000 | 23019     | 0                          | 72                         | 3                            | 1126.5  | 112     | 698       |
| HDLBP        | 25                     | 25.168 | 0       | 32666    | 13983     | 1                          | 2                          | 2                            | 1126.5  | 1317    | 709       |
| SPTAN1       | 10                     | 48.021 | 0       | 120240   | 13980     | 0                          | 5                          | 2                            | 1126.5  | 1257    | 710       |
